# Supplementary material
Source: MDPI journal article supplement (https://www.mdpi.com/2504-5377/3/2/46)
Supplement: s1 [file s1]

Supplementary Materials

# Direct Cryo Writing of Aerogels Via 3D Printing of Aligned Cellulose Nanocrystals Inspired by the Plant Cell Wall

Doron Kam<sup>12</sup>, Michael Chasnitsky<sup>3</sup>, Chen Nowogrodski<sup>1</sup>, Ido Braslavsky<sup>3</sup>, Tiffany Abitbol<sup>4</sup>, Shlomo Magdassi<sup>2\*</sup> and Oded Shoseyov<sup>1\*</sup>

<sup>1</sup> Department of Plant Sciences and Genetics in Agriculture, Robert H. Smith Faculty of Agriculture, Food and Environment, The Hebrew University of Jerusalem, Rehovot 76100, Israel.

<sup>2</sup> Casali Center of Applied Chemistry, Institute of Chemistry, The Hebrew University of Jerusalem, Jerusalem 91904, Israel.

<sup>3</sup> Institute of Biochemistry, Food Science and Nutrition, Robert H. Smith Faculty of Agriculture, Food and Environment, The Hebrew University of Jerusalem, Rehovot 76100, Israel.

<sup>4</sup> RISE, Stockholm 114 28, Sweden.

\* Correspondence: magdassi@mail.huji.ac.il, shoseyov@agri.huji.ac.il

17

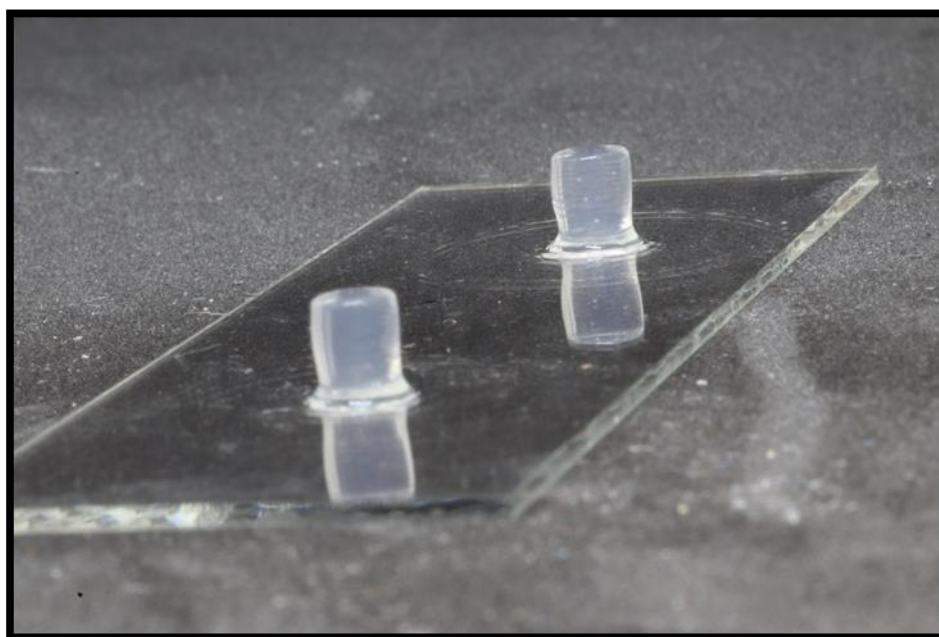

18

19

**Figure S1.** Photograph of 3D printed pure CNC cylinders pre-freezing (diameter = 5 mm; height = 5 mm).

20

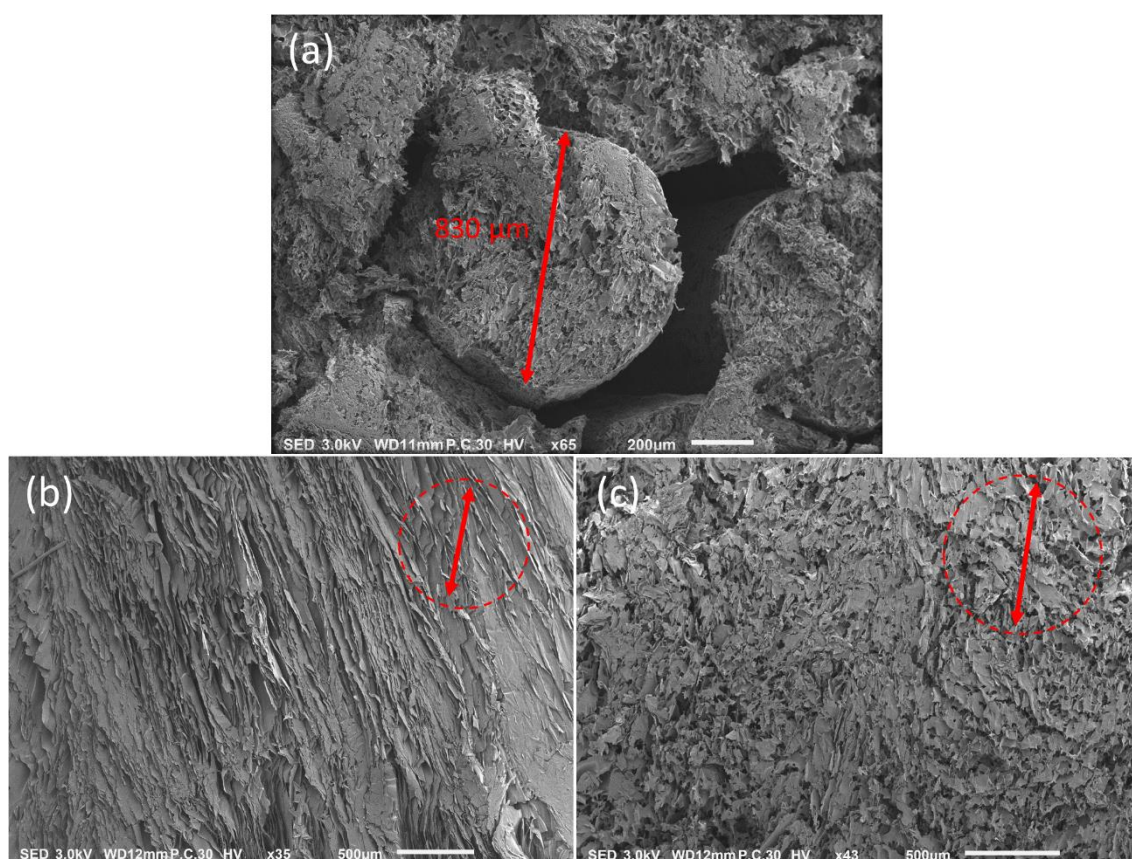

21 **Figure S2.** SEM cross-section of: (a) 1:10 CNC:XG ink 3D printed with large spaces as a control sample  
22 to demonstrate poor adhesion in the vertical and horizontal planes. Printed “filaments” with circular  
23 (830 μm diameter) cross-sections can be seen in the (b) 0:1 sample and (c) 1:50 sample. Red-dashed  
24 circular outlines are placed for reference to indicate a size relative to a filament with a 830 μm  
25 diameter.

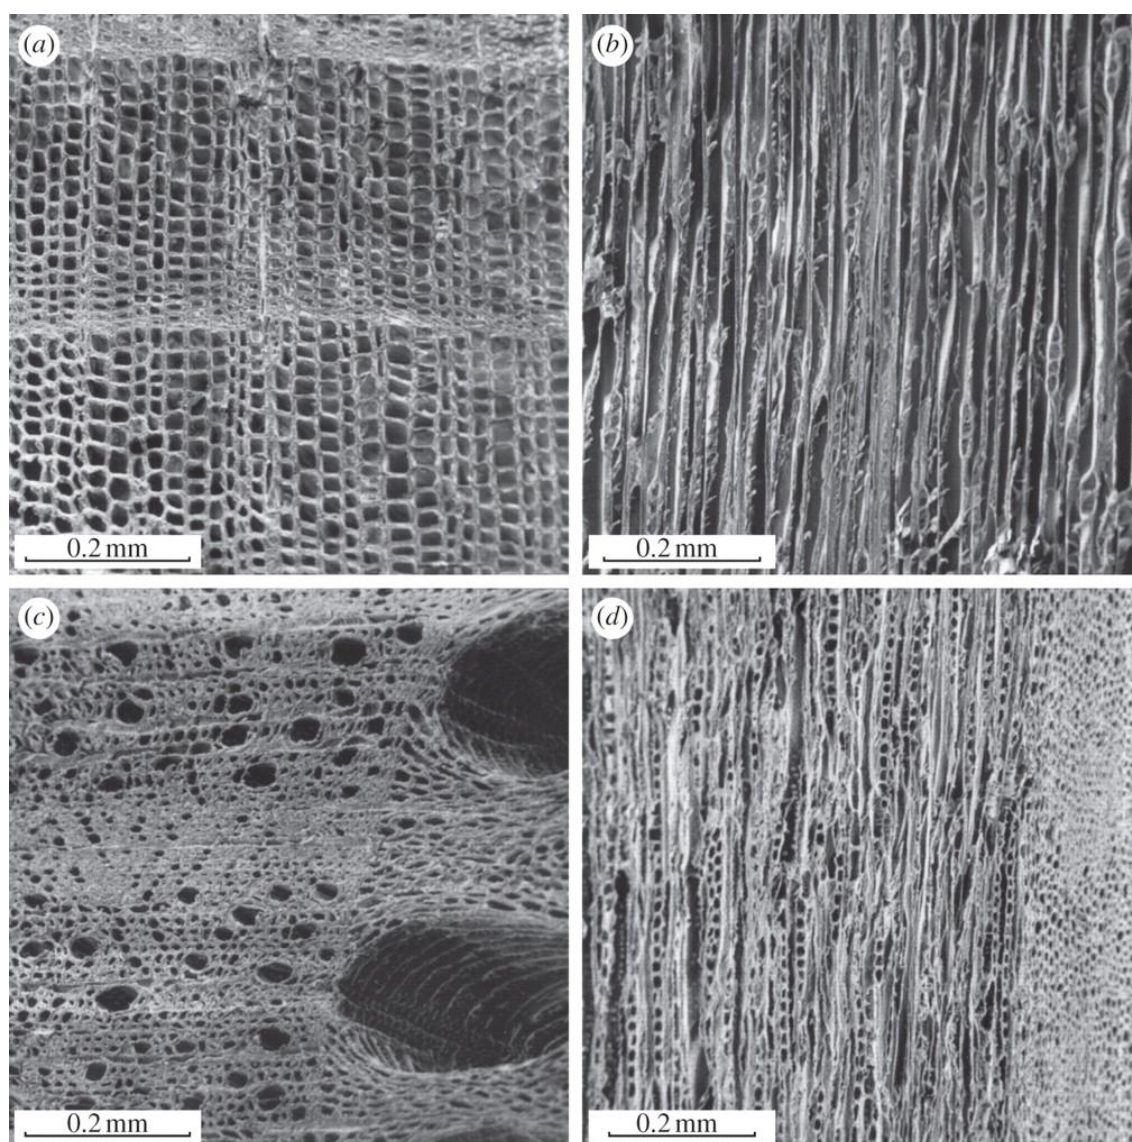

**Figure S3.** Scanning electron micrographs of wood: (a) cedar, cross-section; (b) cedar, longitudinal section; (c) oak, cross-section; (d) oak, longitudinal section.

Reproduced with permission [1]. © 2012 The Royal Society.

## References

1. Gibson, L.J. The hierarchical structure and mechanics of plant materials. *J. R. Soc. Interface* **2012**, *9*, pp 2749–2766.
